# Supplementary material
Source: HighWire-hosted journal article supplement (https://erj.ersjournals.com/highwire/filestream/113606/field_highwire_adjunct_files/7/patient_info_-_tests_conducted_in_tb_clinics_-_turkish.pdf)
Supplement: patient_info_-_tests_conducted_in_tb_clinics_-_turkish.pdf [file patient_info_-_tests_conducted_in_tb_clinics_-_turkish.pdf]

# Tüberküloz (Verem) kliniklerinde yapılan tahliller

## Göğüs Röntgeni

Bu, akciğerinizde tüberküloz olup olmadığını kontrol etmek için yapılmaktadır. Tedavinizin işleyip işlemediğini kontrol etmek için ileride tekrar edilebilir.

## Tükürük/ balgam tahlili

Akciğerlerinizde tüberküloz olup olmadığını kontrol etmek için tükürük örnekleri vermeniz istenebilir. Tedavinizin işleyip işlemediğini kontrol etmek için tahlil ileride tekrar edilebilir.

## Kan tahlilleri

Kan tahlilleri, anemik (kansızlık hastalığı) olup olmadığınızı ya da vücudunuzda bir enfeksiyon bulunup bulunmadığını gösterebilir. Tedavinin başlangıcını takiben bu tahlillerin tekrar edilmesi, bize enfeksiyonun kaybolmakta olup olmadığına dair bilgi verebilir.

Tedavi öncesinde ve sırasında karaciğerinizin ve böbreklerinizin nasıl çalıştıkları hakkında bilgi edinebilmemiz için başka tahliller yapılmaktadır. Bazı ilaçlarınızın karaciğerinizi ve böbreklerinizi etkileyebilecek olmaları nedeniyle bu tahliller önemlidir.

## Diğer enfeksiyonlar için tahliller

Tüberküloz kliniğine gelen herkese bir HIV (AIDS - Elisa testi) testi sunmaktayız. HIV, vücudun bağışıklık sistemine zarar verdiği için tüberküloz daha kolay yerleşebilir. Sağlığınızı geliştirebilecek HIV ile ilgili iyi tedaviler mevcuttur.

## Diğer enfeksiyonlar için tahliller

Hepatit B ve hepatit C (Sarılık) enfeksiyonları için de sizi tahlil edebiliriz. Bu enfeksiyonlar karaciğerinizin işleyiş şeklini değiştirebilirler ve tüberküloz tedavinizi etkileyebilirler. Tahlil sonucunuzun pozitif çıkması durumunda bir uzman ekibe sevk edilebilirsiniz.

## Gizlilik ilkesi

Tüm tahlillerinizin sonuçları gizlilik ilkeleri çerçevesinde işlem görecektir ve sadece bakımınız ile doğrudan alakalı olan sağlık bakım profesyonelleri ile ilgili bilgiler paylaşılacaktır.

## Ek bilgiler

### HIV (AIDS)

NAHIP: [www.nahip.org.uk](http://www.nahip.org.uk)

Do It Right:

[www.doitright.uk.com](http://www.doitright.uk.com)

THT: [www.tht.org.uk](http://www.tht.org.uk)

### Tüberküloz (Verem)

NKS TB:

[www.hpa.org.uk/tbknowledge](http://www.hpa.org.uk/tbknowledge)

TB Alert: [www.tbalert.org](http://www.tbalert.org)

### Diğer faydalı siteler

NHS choices: [www.nhs.uk](http://www.nhs.uk)

Health Protection Agency:

[www.hpa.org.uk](http://www.hpa.org.uk)
